# Supplementary material for: Mycobacterium avium subsp. paratuberculosis MAP1889c Protein Induces Maturation of Dendritic Cells and Drives Th2-Biased Immune Responses
Source: PubMed Central journal article supplement (PMC7226993; doi:10.3390/cells9040944), 2020-04-11
Supplement: cells-09-00944-s001.pdf [file cells-09-00944-s001.pdf]

## Supplementary figures

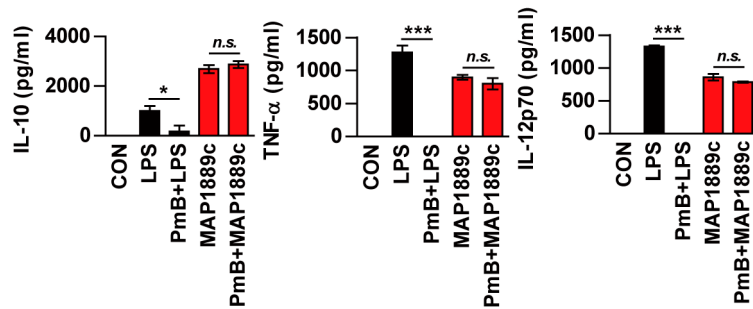

**Figure S1. Confirmation of endotoxin decontamination of the purified MAP1889c.** BMDCs were incubated with LPS (100 ng/mL) or MAP1889c (10  $\mu$ g/mL) with or without pretreatment with polymyxin B (PmB) for 1 h. After 24 h, IL-10, TNF- $\alpha$ , and IL-12p70 production in the culture supernatants was analyzed by ELISA. All data are expressed as the mean  $\pm$  SD ( $n = 3$ ). \*  $p < 0.05$ , and \*\*\*  $p < 0.001$  for treatment compared with the difference between treatment data. *n.s.*, no significant difference.

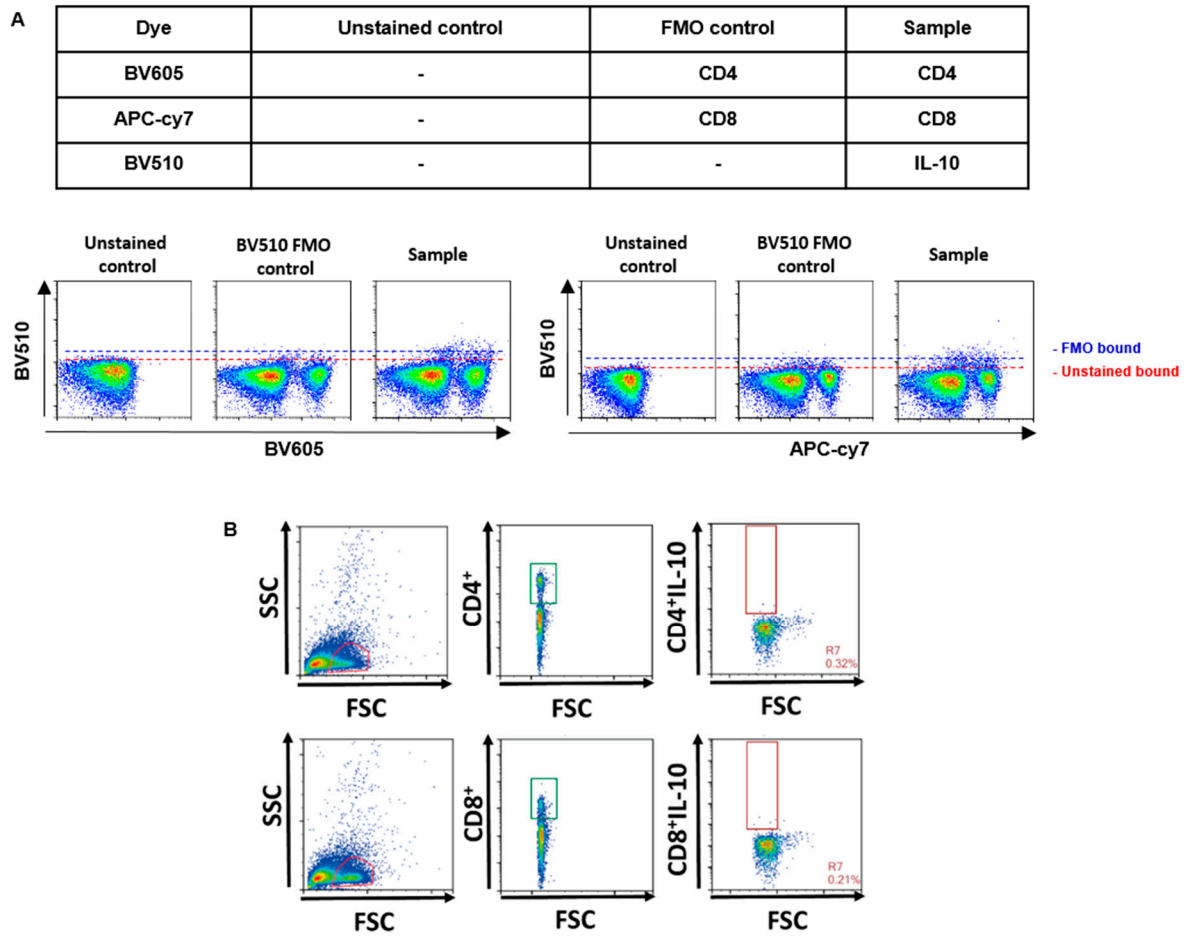

**Figure S2. Gating strategy for IL-10 cytokine from T cells for Figure 6E.** (A) FMO control performed by excluding only the flour of interest. (B) After that, gating was selected based on the FMO bound line. Next, each of the CD4<sup>+</sup> and CD8<sup>+</sup> cells was selected. For cells in each of the CD4<sup>+</sup> and CD8<sup>+</sup> gates for IL-10 were then established.

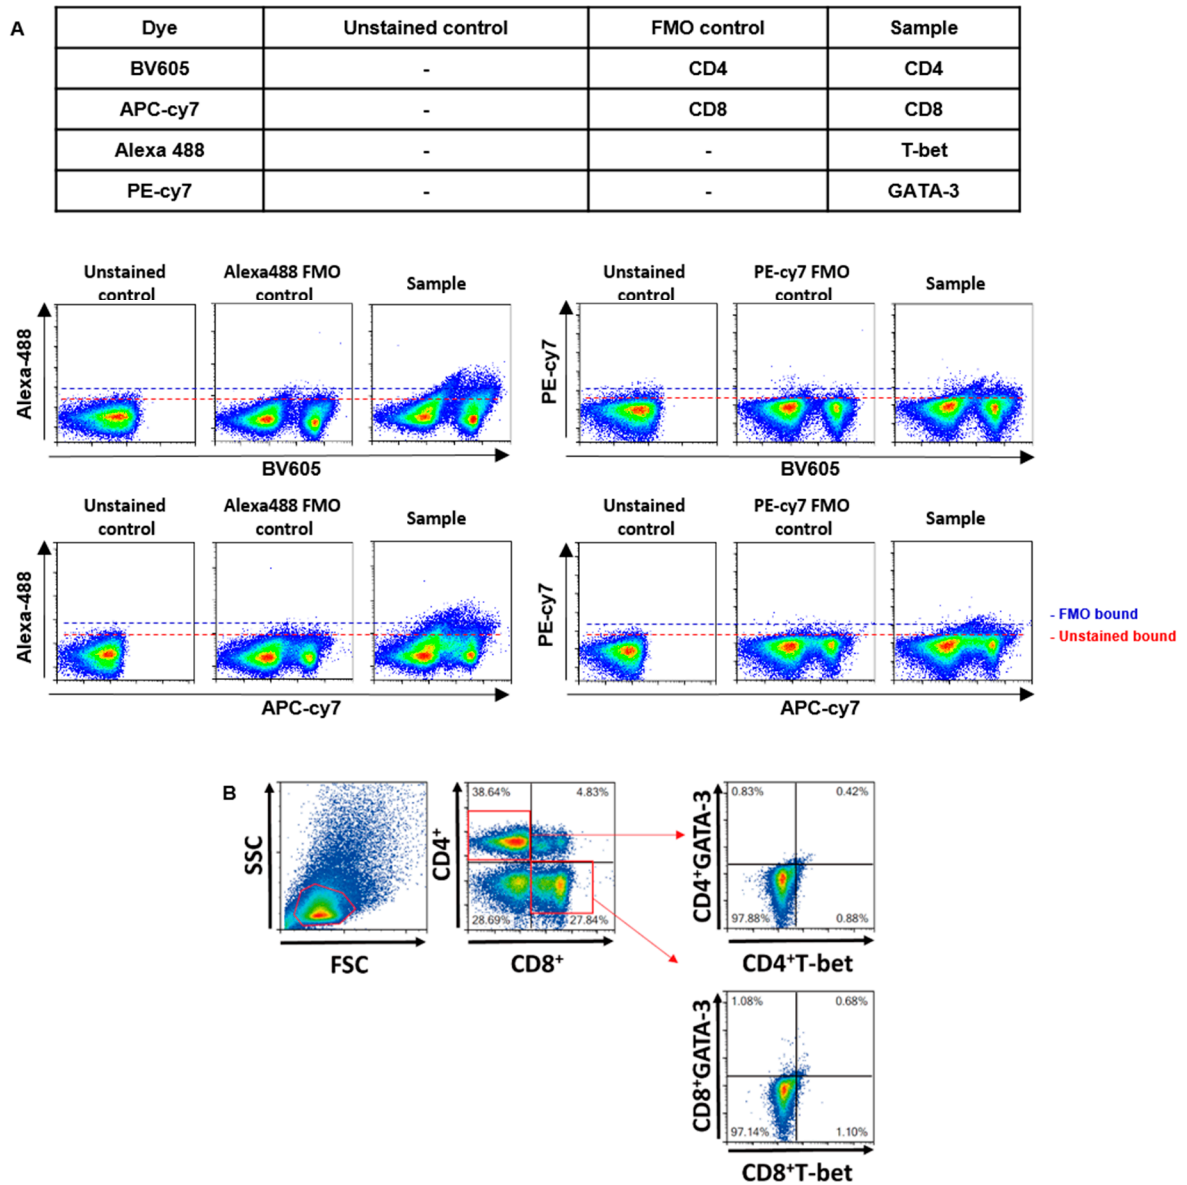

**Figure S3. Gating for transcription factor T-bet and GATA-3 from T cells for Figure 7B. (A)** FMO control by excluding only the flour of interest. **(B)** After that, gating was selected based on the FMO bound line. Next, each of the CD4<sup>+</sup> and CD8<sup>+</sup> cells was selected. For cells in each of the CD4<sup>+</sup> and CD8<sup>+</sup> gates, individual gates for T-bet and GATA-3 were then established.

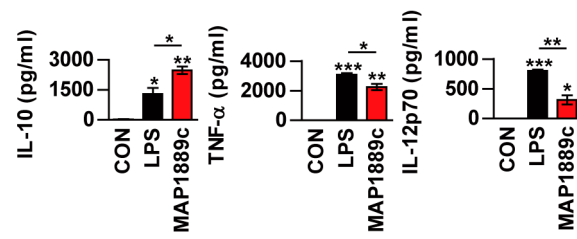

**Figure S4. MAP1889c induces high levels of IL-10 production in BMDMs.** The BMDMs were stimulated with MAP1889c (10 μg/mL), LPS (100 ng/mL) for 24 h. IL-10, TNF-α, and IL-12p70 cytokines from the culture supernatants were measured by ELISA.
